# Supplementary material for: Potent and broadly neutralizing antibodies against sarbecoviruses induced by sequential COVID-19 vaccination
Source: PubMed Central journal article supplement (PMC10847457; doi:10.1038/s41421-024-00648-1), 2024-02-06
Supplement: 41421_2024_648_MOESM1_ESM.pdf [file 41421_2024_648_MOESM1_ESM.pdf]

## **Supplemental Information**

### **Potent and broadly neutralizing antibodies against sarbecoviruses induced by sequential COVID-19 vaccination**

Xiaoyu Zhao<sup>1,#</sup>, Tianyi Qiu<sup>2,#</sup>, Xiner Huang<sup>3,#</sup>, Qiyu Mao<sup>1,4,#</sup>, Yajie Wang<sup>1,4,#</sup>, Rui Qiao<sup>1,#</sup>, Jiayan Li<sup>1</sup>, Tiantian Mao<sup>5,6</sup>, Yuan Wang<sup>6</sup>, Yewei Cun<sup>5</sup>, Caicui Wang<sup>6</sup>, Cuiting Luo<sup>3</sup>, Chaemin Yoon<sup>3</sup>, Xun Wang<sup>1</sup>, Chen Li<sup>1</sup>, Yuchen Cui<sup>1</sup>, Chaoyue Zhao<sup>1</sup>, Minghui Li<sup>1</sup>, Yanjia Chen<sup>1</sup>, Guonan Cai<sup>1</sup>, Wenye Geng<sup>7</sup>, Zixin Hu<sup>1,8</sup>, Jinglei Cao<sup>9</sup>, Wenhong Zhang<sup>9</sup>, Zhiwei Cao<sup>5,\*</sup>, Hin Chu<sup>3,\*</sup>, Lei Sun<sup>1,4,\*</sup>, Pengfei Wang<sup>1,\*</sup>

#### **This file includes:**

Supplementary Figures S1-19

Supplementary Tables S1-3

## Supplementary Fig. S1

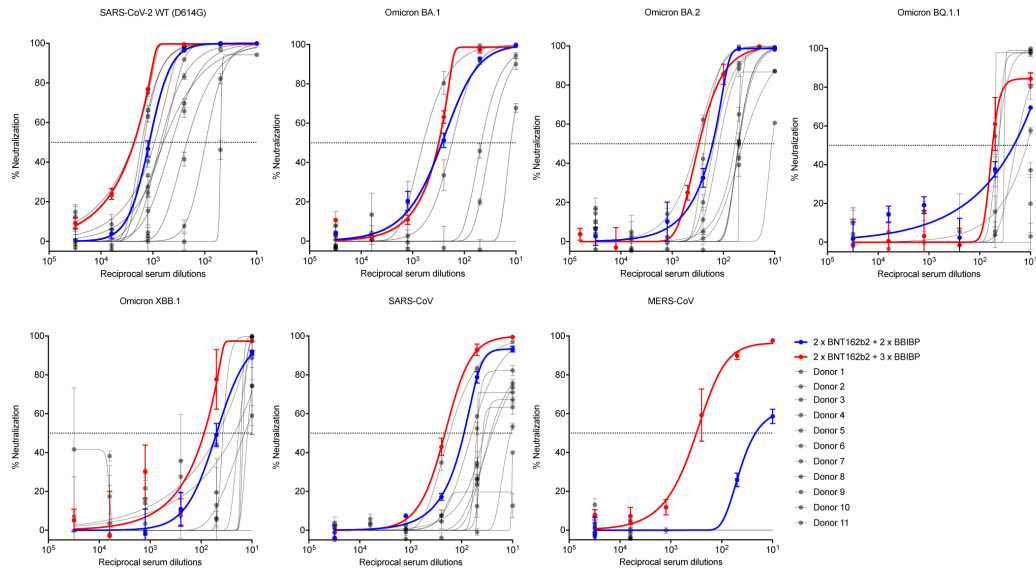

**Supplementary Fig. S1** Neutralization curves for sera collected from a healthy volunteer after the fourth- (2 x BNT162b2 + 2 x BBIBP-CorV) or the fifth-vaccination dose (2 x BNT162b2 + 3 x BBIBP-CorV), or from individuals vaccinated with three-dose BBIBP-CorV only ( $n = 11$ ) against indicated coronavirus. The data are representative of one of at least three independent experiments and are presented as the mean  $\pm$  SEM.

## Supplementary Fig. S2

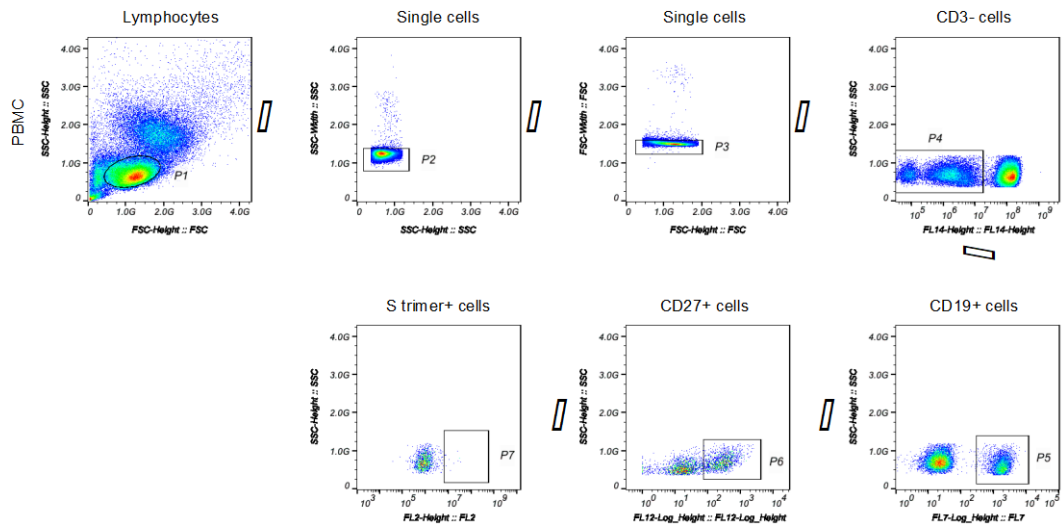

**Supplementary Fig. S2** Sorting strategy for the isolation of MERS-CoV or SARS-CoV-2 Omicron S trimer-specific memory B cells using flow cytometry. The sorting primarily focused on live memory B lymphocytes that were CD3<sup>-</sup>, CD19<sup>+</sup>, and CD27<sup>+</sup>. The final step focused on those cells that bind to the MERS-CoV or SARS-CoV-2 Omicron S trimer.

**Supplementary Fig. S3**

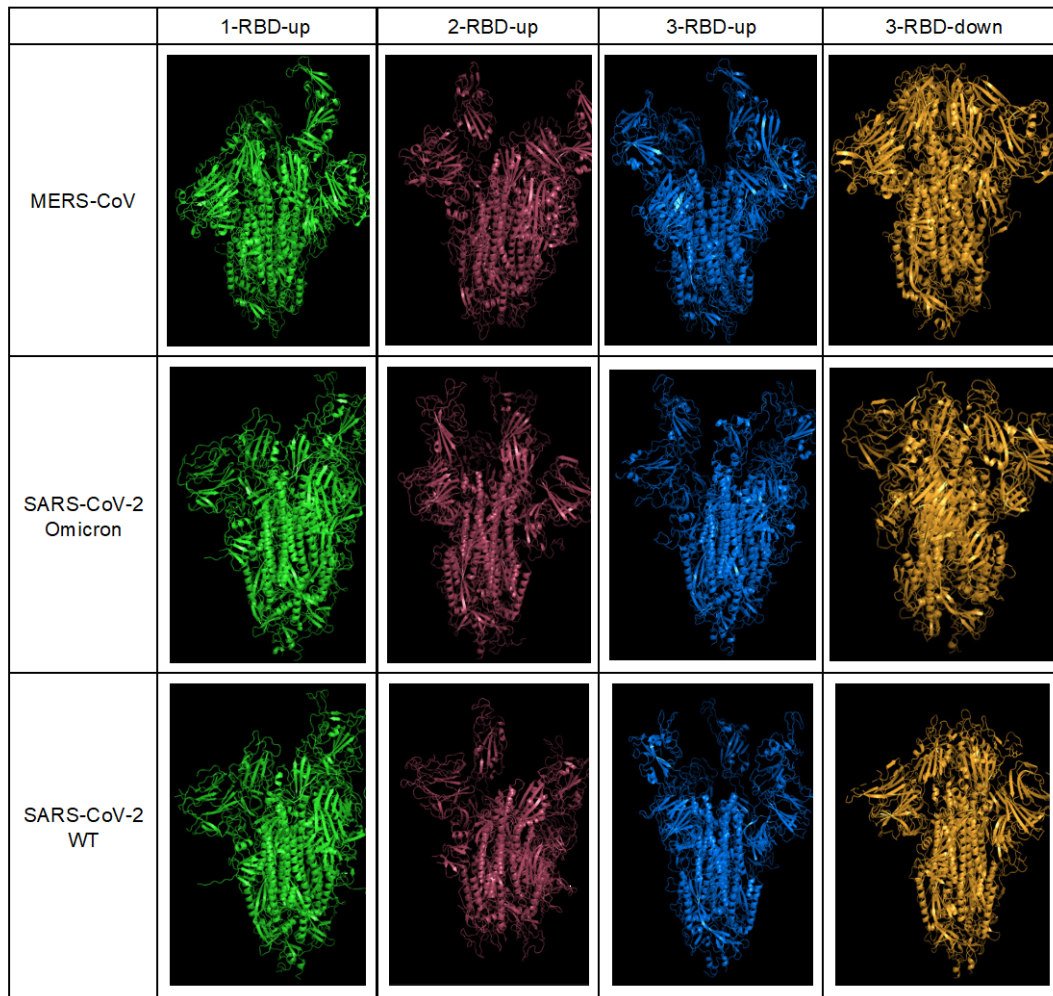

**Supplementary Fig. S3** Structure illustration of four S trimer types of SARS-CoV-2 WT, Omicron and MERS-CoV.

## Supplementary Fig. S4

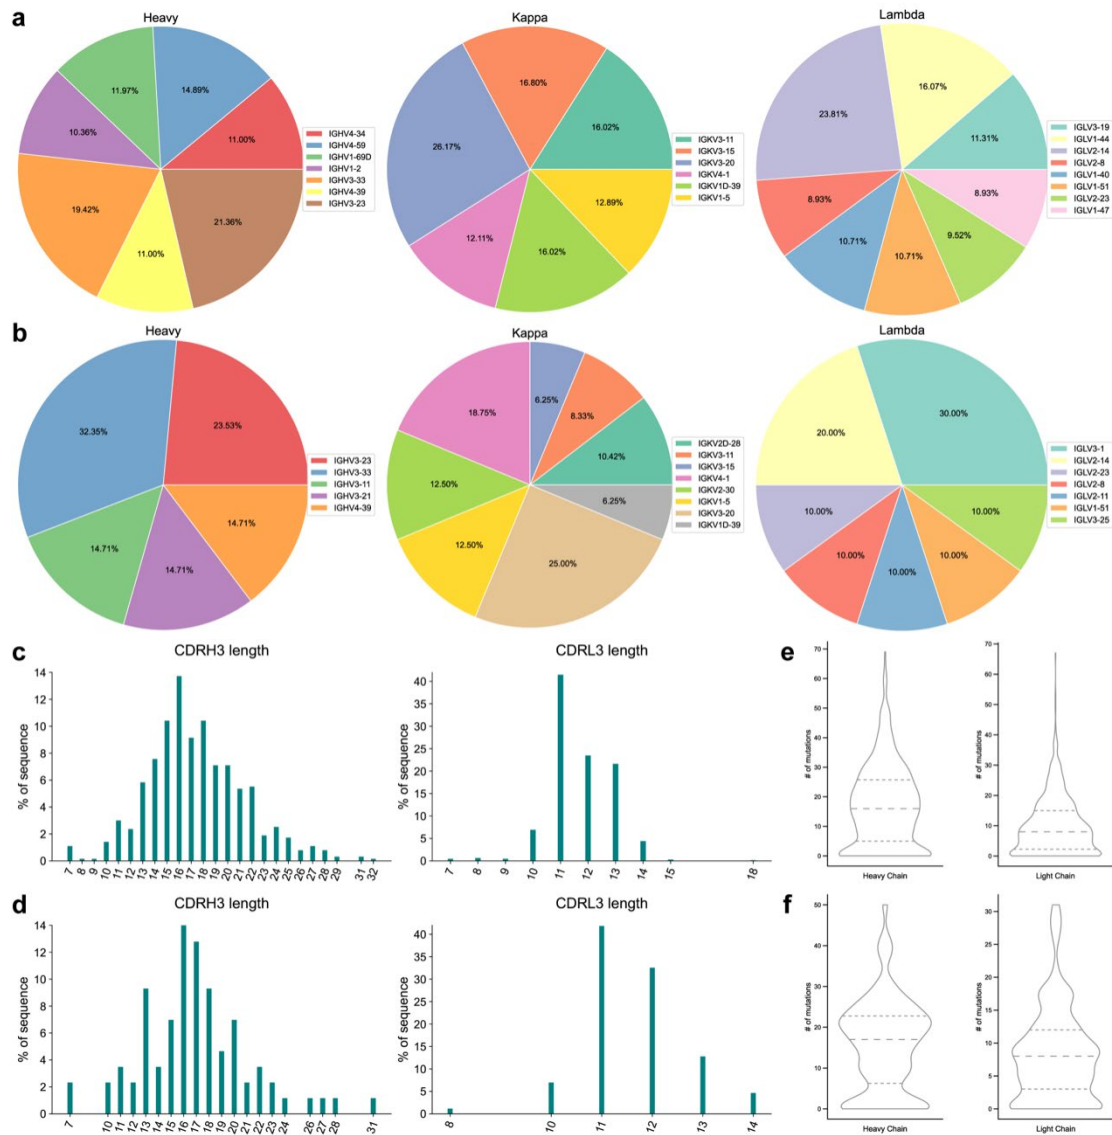

**Supplementary Fig. S4** The V gene usage was assigned for paired heavy, kappa and lambda chains recovered from all the 684 sorted S trimer-specific mAbs (**a**) and the 86 mAbs further selected by bioinformatic analysis (**b**). Percentages are shown on graph for V chains that make up more than 5% of the total for each sort. The CDR3 length distribution for the heavy and light chains of the 684 mAbs (**c**) and the 86 mAbs (**d**). The number of nucleotide mutations in heavy and light chains of the 684 mAbs (**e**) and the 86 mAbs (**f**).

## Supplementary Fig. S5

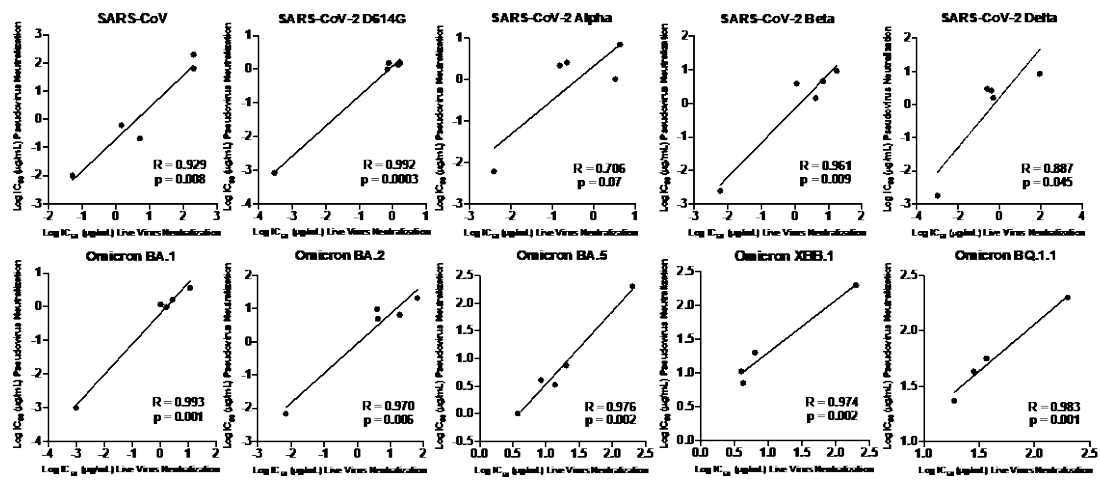

**Supplementary Fig. S5** Correlation of live virus neutralization titers versus pseudovirus neutralization titers against SARS-CoV, SARS-CoV-2 and SARS-CoV-2 variants. The Pearson correlation coefficient (R) and the *P* value were calculated using GraphPad Prism. Experiments were performed in triplicates for all mAbs tested.

## Supplementary Fig. S6

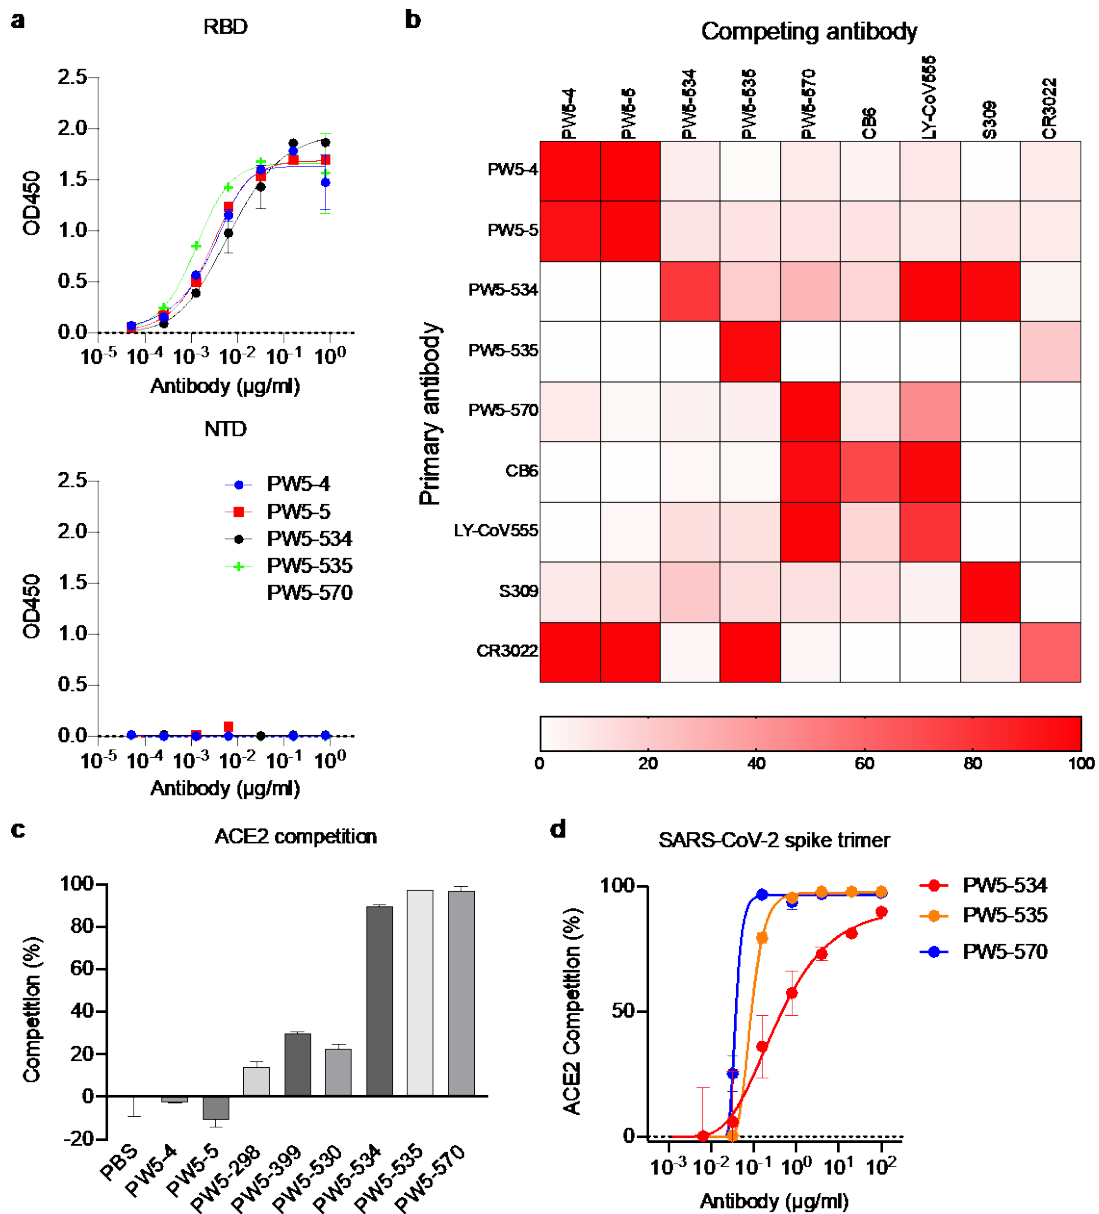

**Supplementary Fig. S6 Binding properties of the selected mAbs.** **a** Binding profiles of 5 purified potent neutralizing mAbs against the RBD (up), and NTD (down) of SARS-CoV-2. **b** Epitope mapping of the selected mAbs using a competition ELISA. A heatmap was used to show the competition percentages between two antibodies, as compared with CB6, LY-CoV555, S309 and CR3022, whose epitopes have been well defined. **c** Antibodies competitively blocked the ACE2 binding to SARS-CoV-2 S trimer as measured by ELISA. Recombinant human ACE2 protein and phosphate buffer

solution (PBS) was used as controls. **d** PW5-534, PW5-535, and PW5-570 blocked the ACE2 binding to SARS-CoV-2 S-trimer in a dose dependent manner. The data are representative of one of at least three independent experiments and are presented as the mean  $\pm$  SD.



## Supplementary Fig. S7

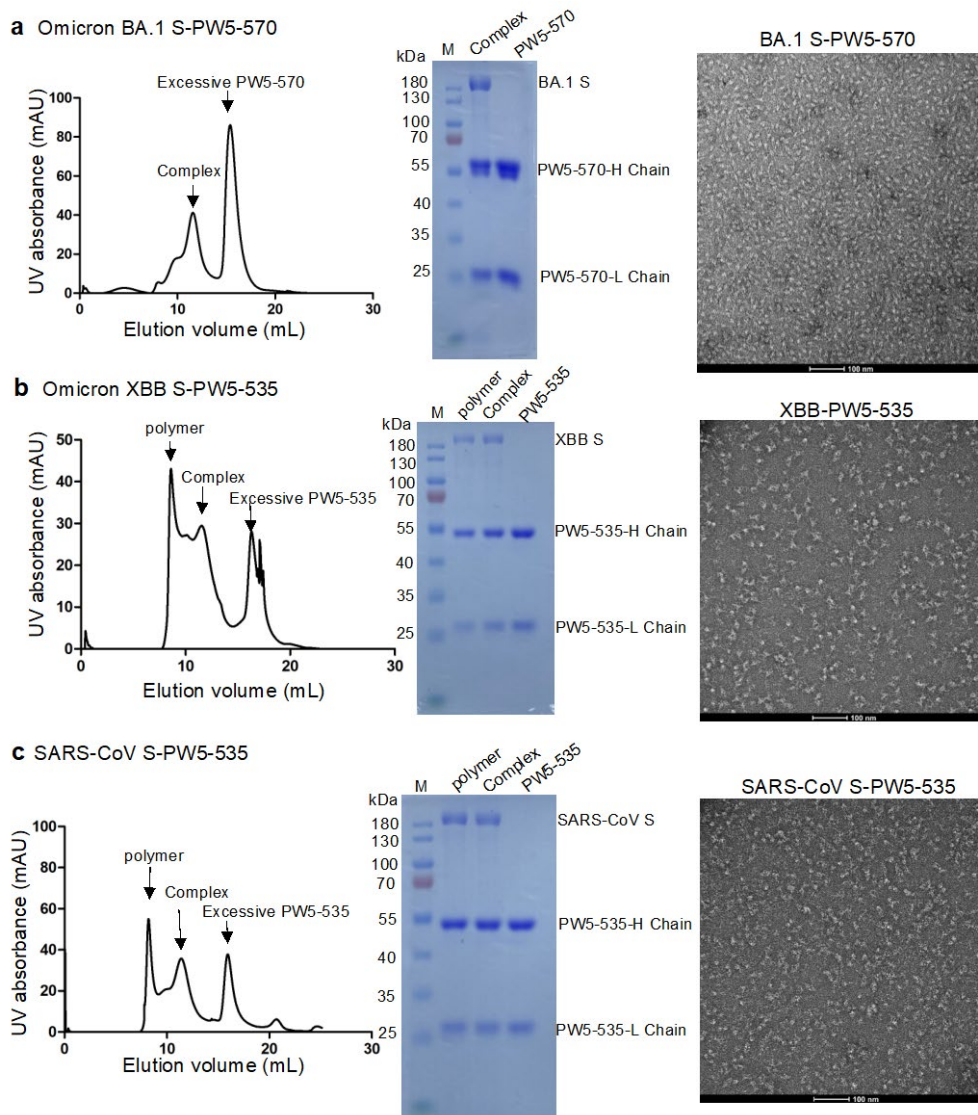

**Supplementary Fig. S7 Sample purification of BA.1 S-PW5-570, XBB S-PW5-535 and SARS-CoV S-PW5-535 complex. a** Purification and negative stain images of BA.1 S-PW5-570 complex. **b, c** Purification and negative stain images of XBB S-PW5-535 complex and SARS-CoV S-PW5-535 complex.

Supplementary Fig. S8

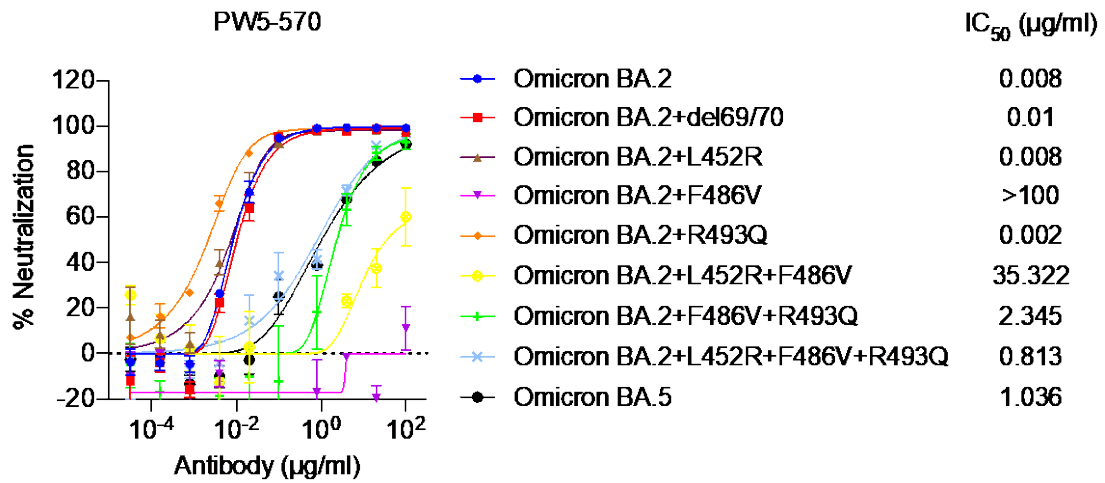

Supplementary Fig. S8 Key mutations conferring PW5-570 antibody resistance.

Neutralization of Omicron BA.2 and Omicron BA.5, as well as the Omicron BA.2-based VSVs with single or combined mutations by PW5-570. The data are representative of one of at least three independent experiments and are presented as the mean  $\pm$  SEM.

## Supplementary Fig. S9

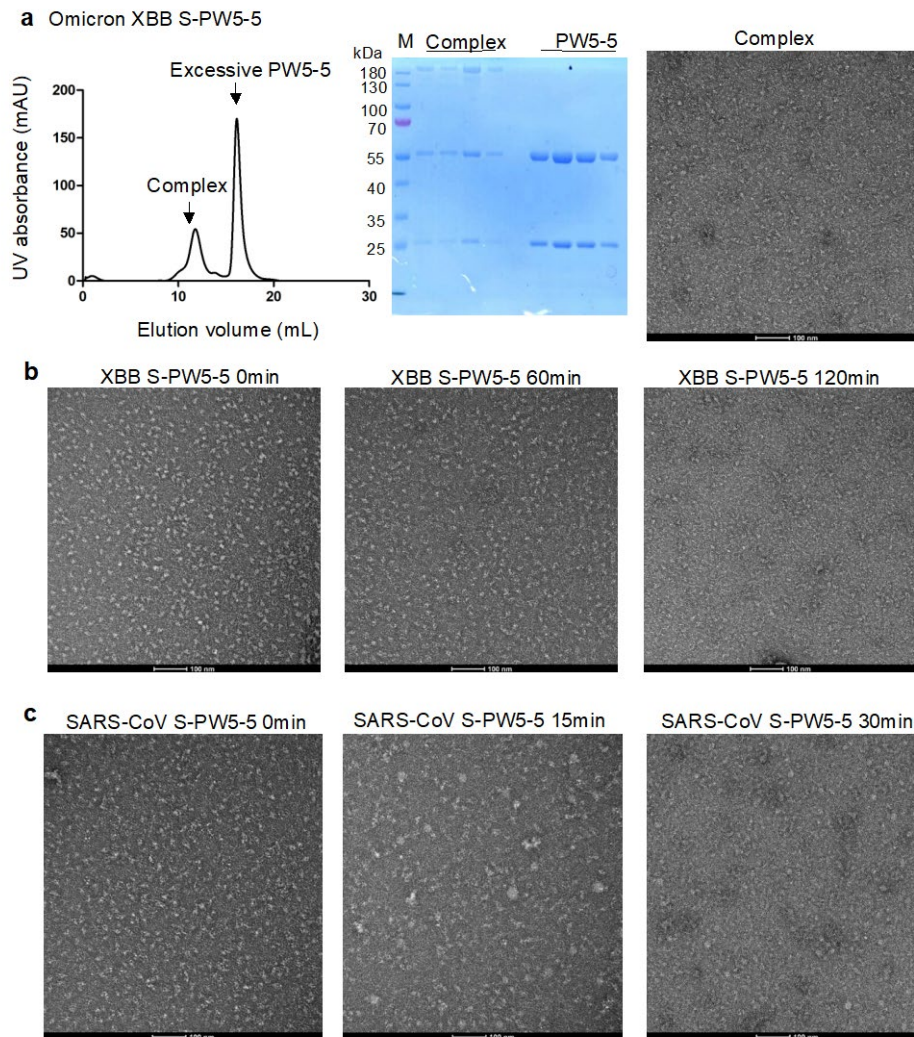

**Supplementary Fig. S9 Sample purification of XBB S-PW5-5 and SARS-CoV S-PW5-5 complex.** **a** Purification of XBB S-PW5-5 complex. The gel-filtration curve showed that PW5-5 and S protein can form complex. **b, c** Negative stain images of XBB S-PW5-5 complex and SARS-CoV S-PW5-5 complex, showing that incubating S with PW5-5 induced S trimer disassembling.

**Supplementary Fig. S10**

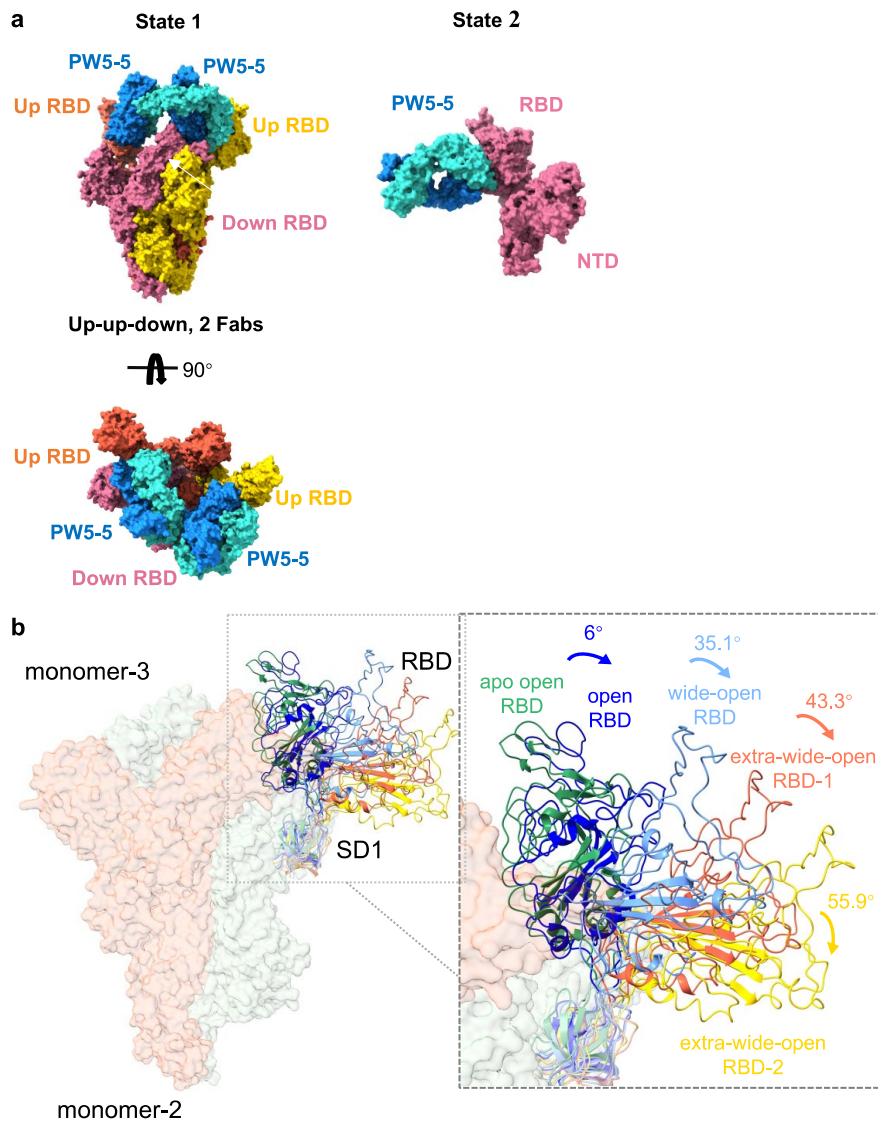

**Supplementary Fig. S10** Cryo-EM structures of the SARS-CoV S in complex with antibody PW5-5 (**a**) and PW5-5 induce obvious movement of RBD (**b**). Green: apo state up RBD (PDBID: 7WVN). Dark blue: up RBD bound with bispecific antibody FD01 (PDBID: 7WOQ). Light blue: up RBD bound with nanobody bn03 (7WHK). Orange: up-RBD 1 in 3-up state XBB S bound with PW5-5. Gold: up-RBD 2 in 3-up state XBB S bound with PW5-5.

## Supplementary Fig. S11

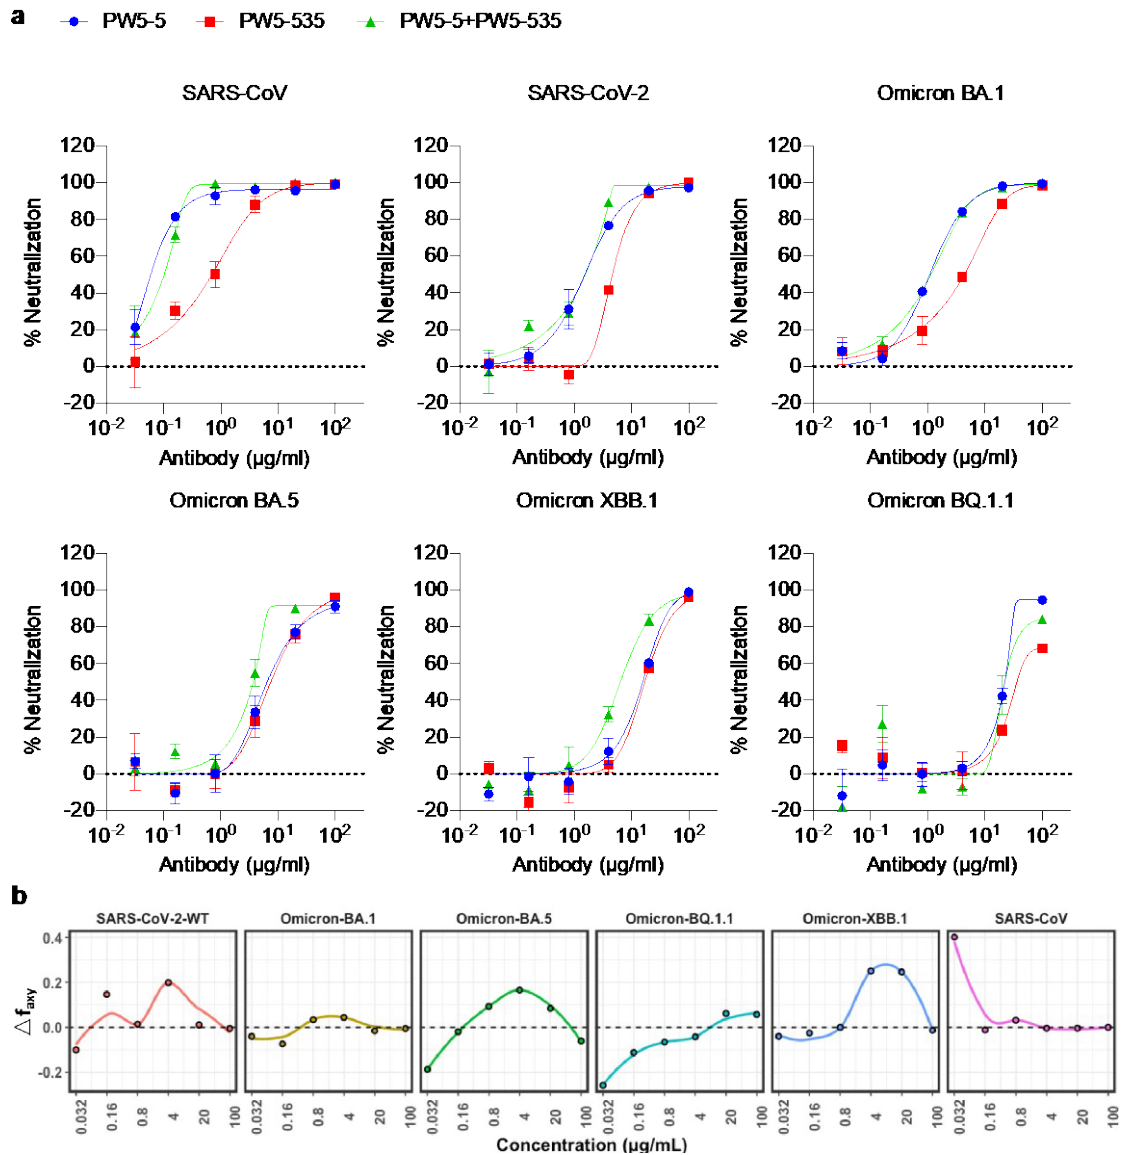

**Supplementary Fig. S11 Neutralization synergy effect by PW5-5 and PW5-535. a** Neutralization of SARS-CoV, SARS-CoV-2, and current Omicron subvariants by PW5-5, PW5-535 and their combination, respectively. **b** The Bliss independence model was utilized for calculation of synergy for PW5-5 and PW5-535 combinations. Synergy is defined as  $\Delta f_{axy} > 0$ , while  $\Delta f_{axy} < 0$  indicates antagonism. The data are representative of one of at least three independent experiments and are presented as the mean  $\pm$  SEM.

## Supplementary Fig. S12

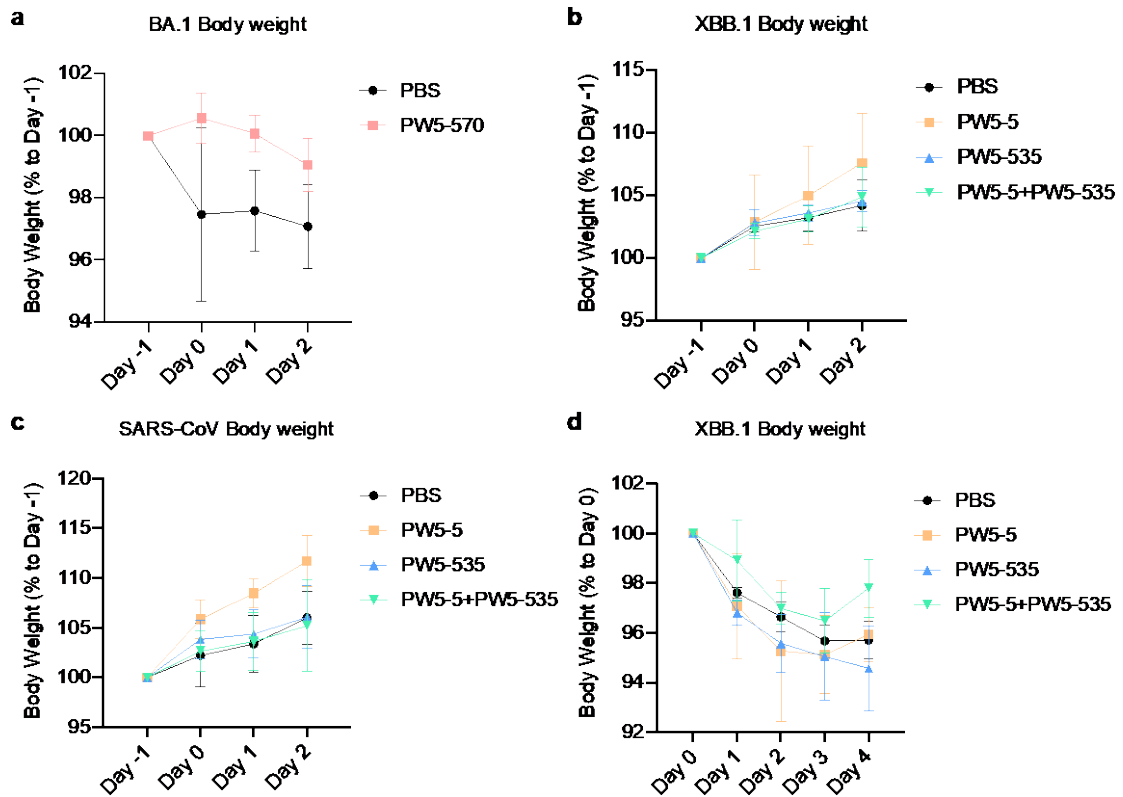

**Supplementary Fig. S12** The body weight change of golden Syrian hamsters infected with SARS-CoV-2 BA.1 (a), XBB.1 (b) or SARS-CoV (c) with prophylactic treatment of the indicated antibody. **d** Body weight changes of therapeutic treatment of PW5-5 and PW5-535 against SARS-CoV-2 XBB.1.



## Supplementary Fig. S13

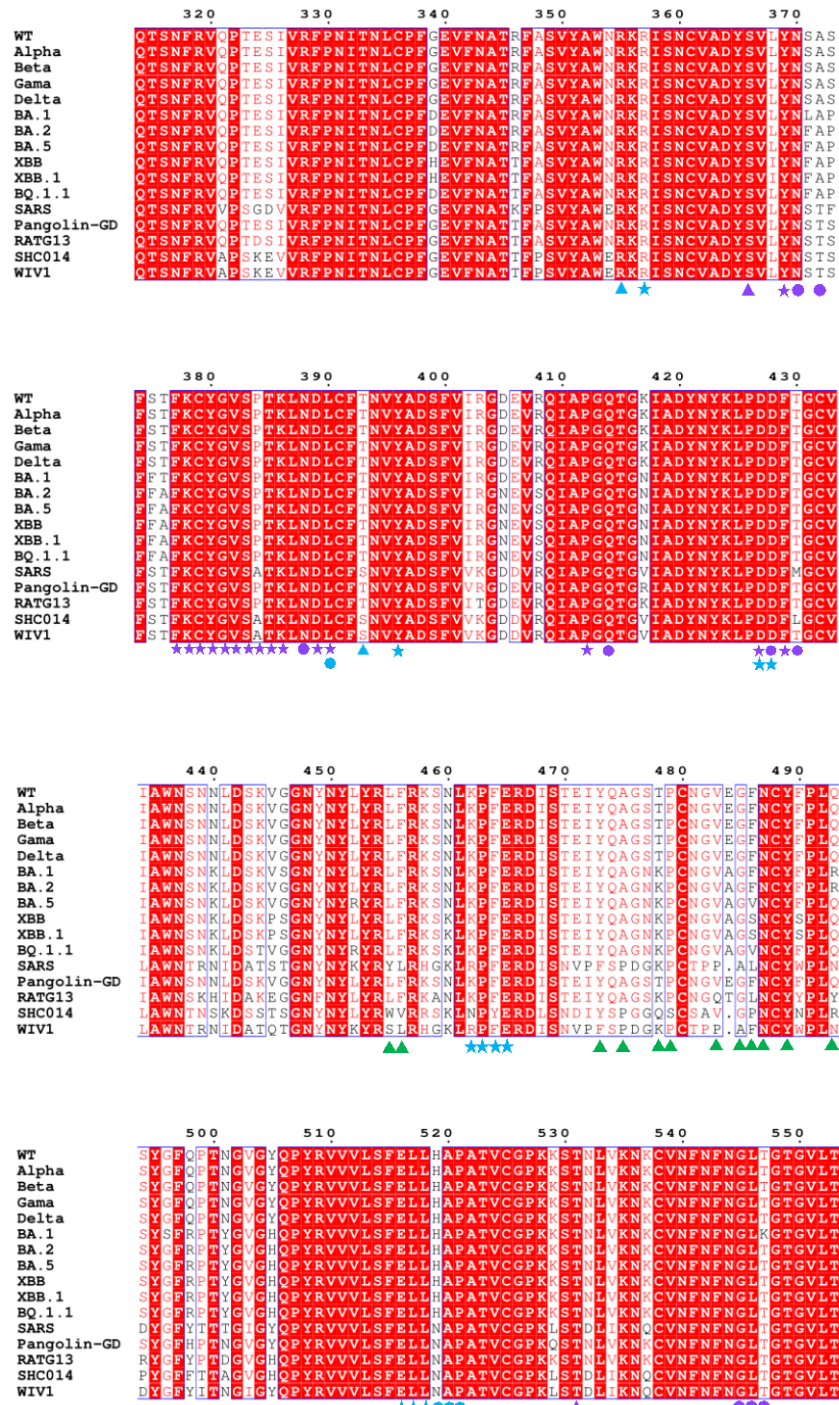

Supplementary Fig. S13 S RBD sequence alignment of SARS-CoV-2 variants, SARS-CoV and other sarbecoviruses. Conserved amino acids are highlighted as red. Residues involved in PW5-570, PW5-5 and PW5-535 binding are marked in green, blue and purple, respectively. Residues involved only in XBB S binding are marked in triangles, only in SARS-CoV S binding are marked in circles and both in XBB and SARS-CoV S binding are marked in stars.

**Supplementary Fig. S14**

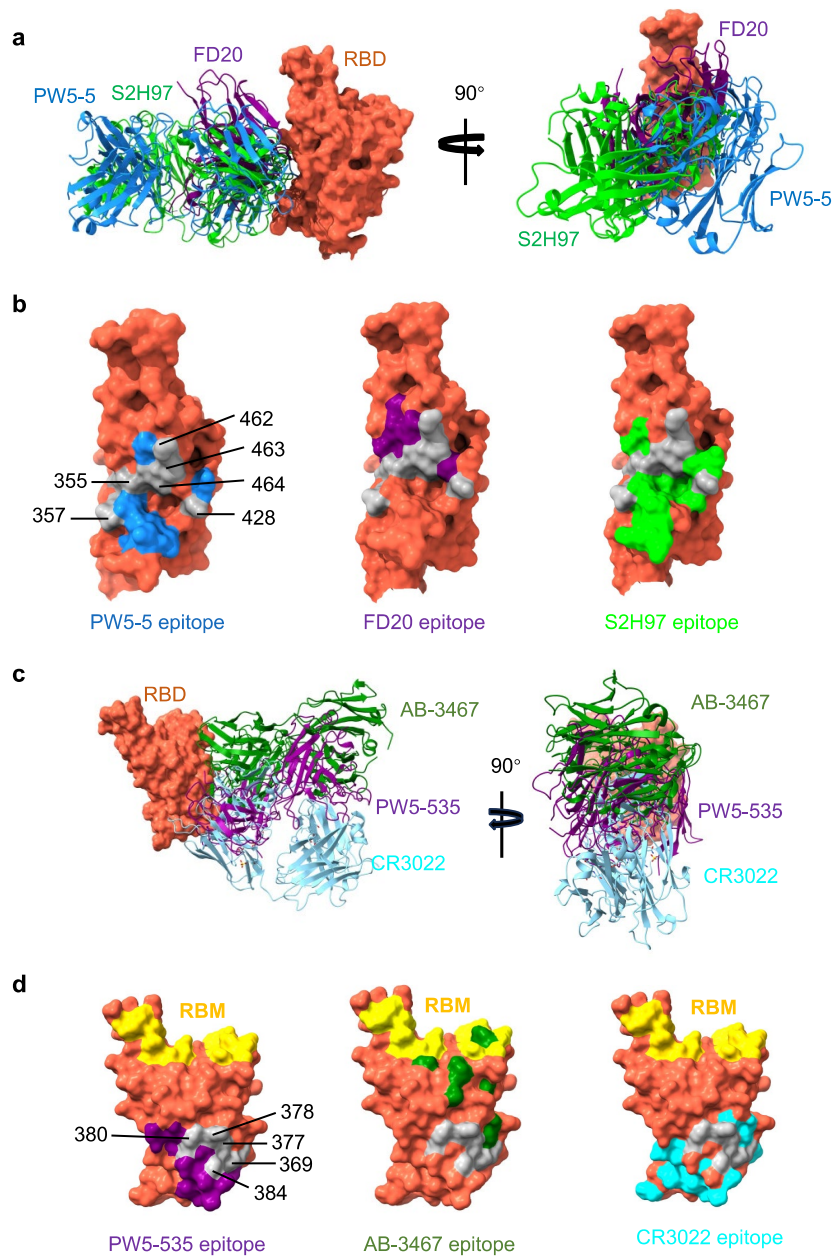

**Supplementary Fig. S14 Antibodies targeting similar epitopes on the SARS-CoV-2 S RBD with PW5-5 and PW5-535.** **a** Comparison of PW5-5 (blue), FD20 (PDBID:7CYV) (purple) and S2H97 (PDBID:7M7W) (green) upon binding to RBD. **b** Surface representation of RBD showing the buried regions by PW5-5, FD20 and S2H97, respectively. **c** Comparison of PW5-535 (purple), AB-3467 (PDBID:7MSQ) (green), CR3022 (PDBID: 6W41) (cyan) and ACE2 upon binding to RBD. **d** Surface representation of RBD showing the buried regions by PW5-535, AB-3467 and CR3022, respectively.



**Supplementary Fig. S15**

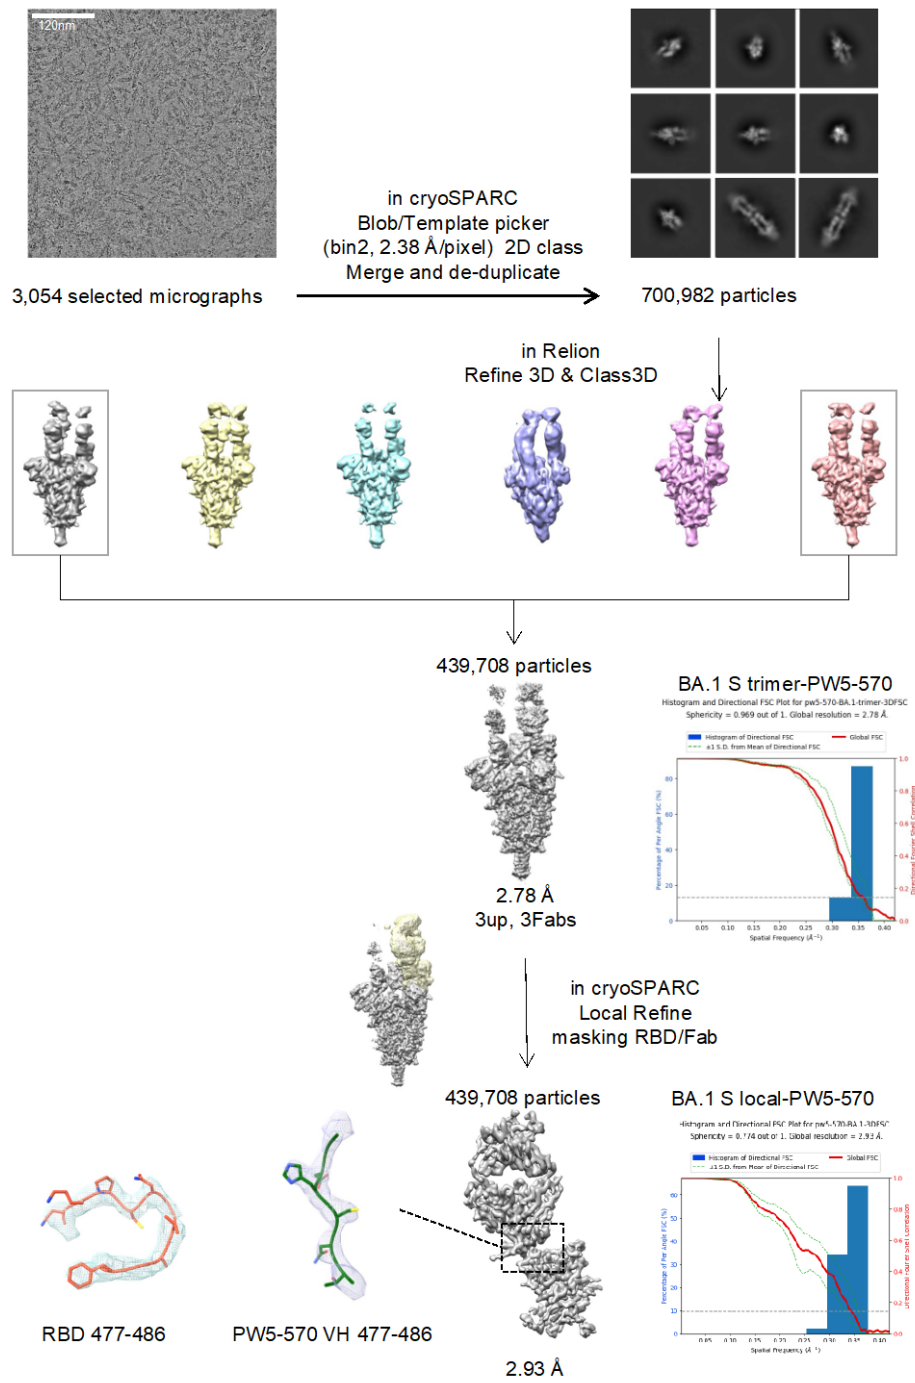

**Supplementary Fig. S15** Data processing flowchart of BA.1-S-PW5-570 complex.

Supplementary Fig. S16

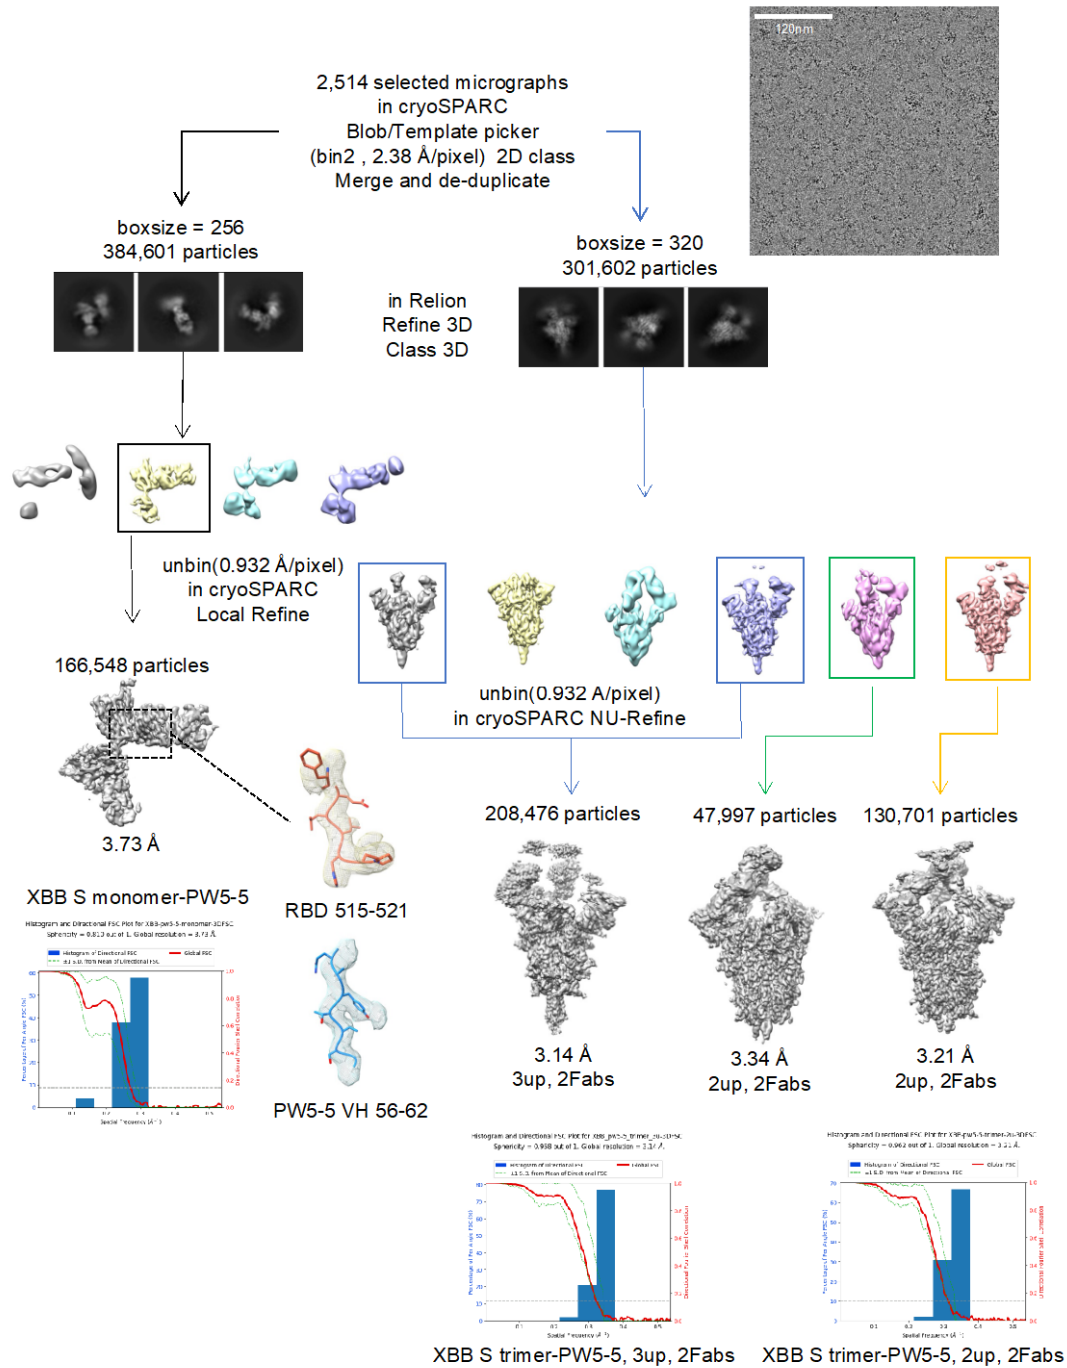

Supplementary Fig. S16 Data processing flowchart of XBB-S-PW5-5 complex.

# Supplementary Fig. S17

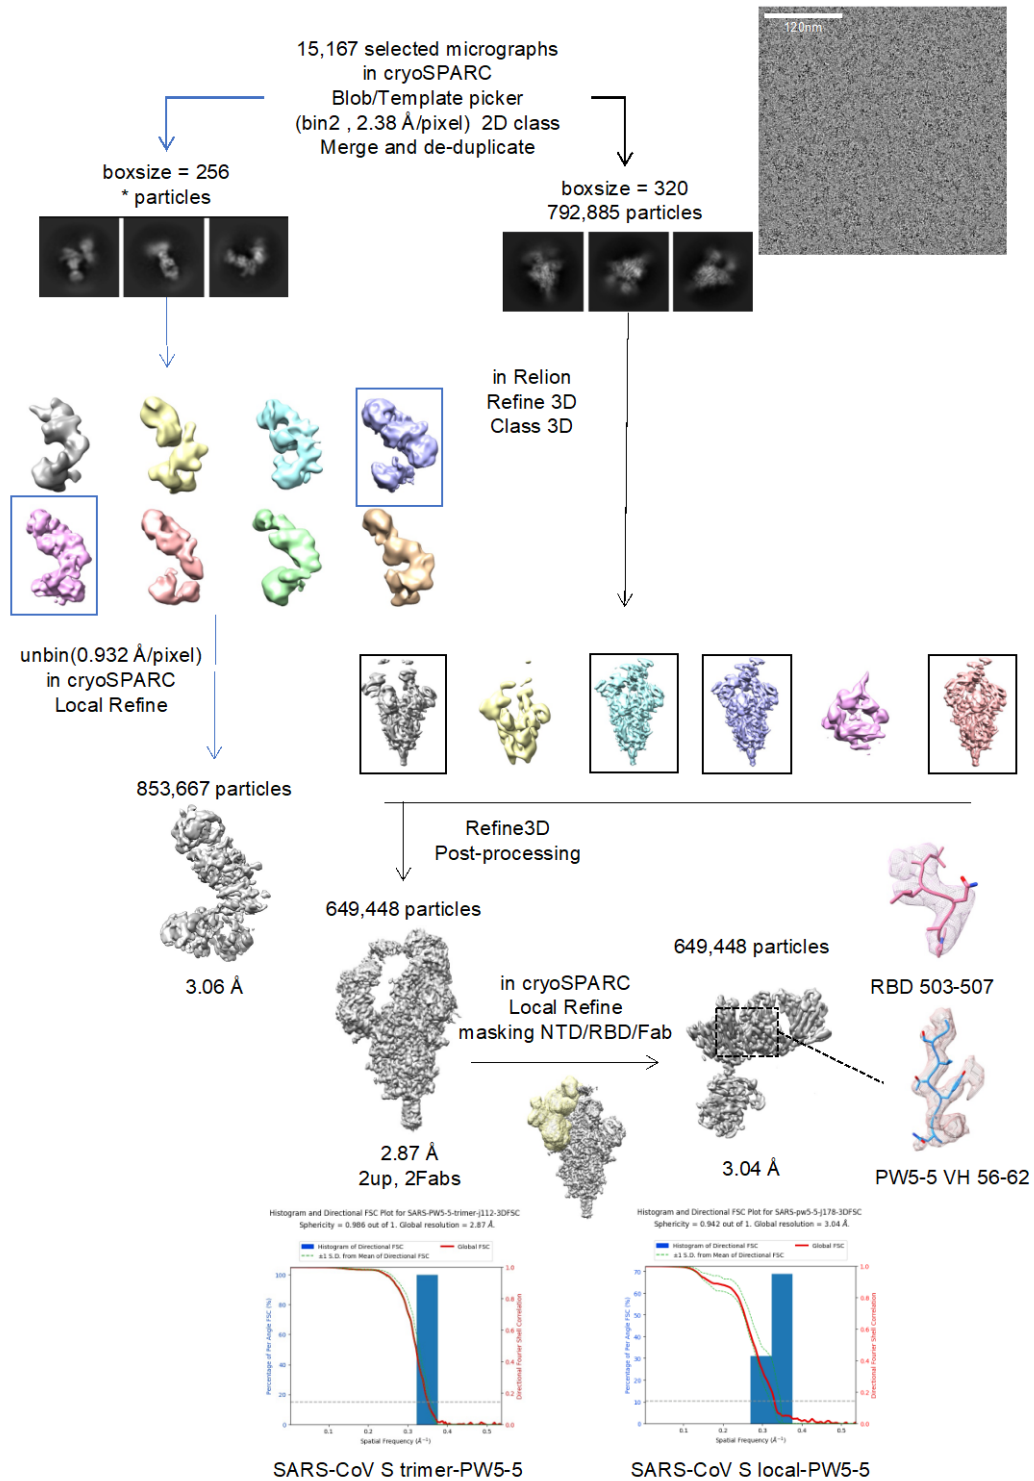

Supplementary Fig. S17 Data processing flowchart of SARS-CoV-S-PW5-5 complex.

# Supplementary Fig. S18

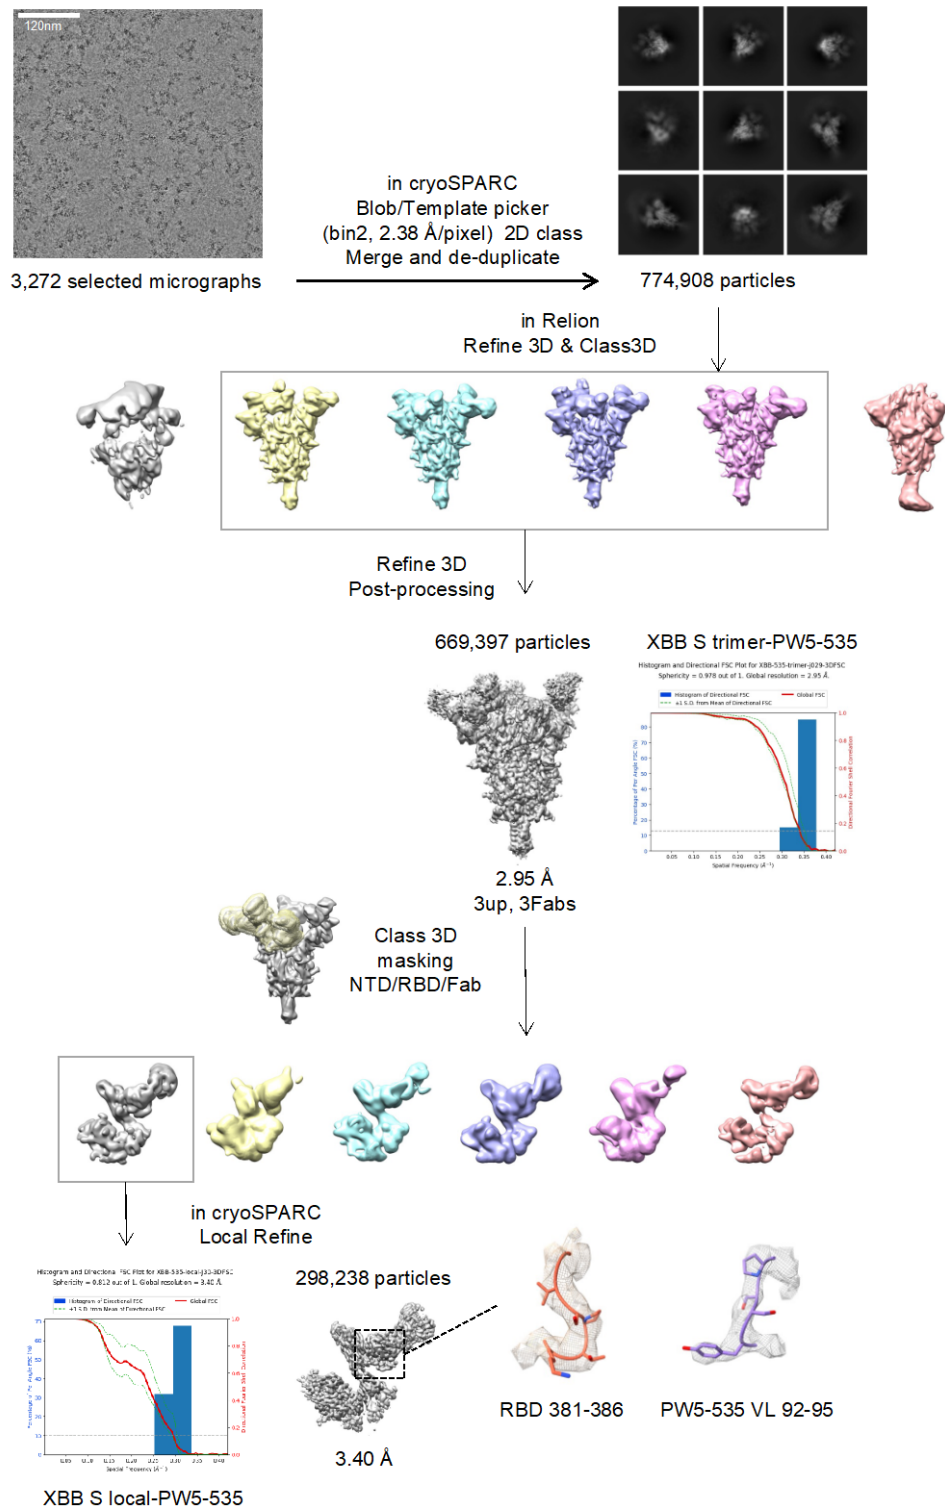

Supplementary Fig. S18 Data processing flowchart of XBB-S-PW5-535 complex.

**Supplementary Fig. S19**

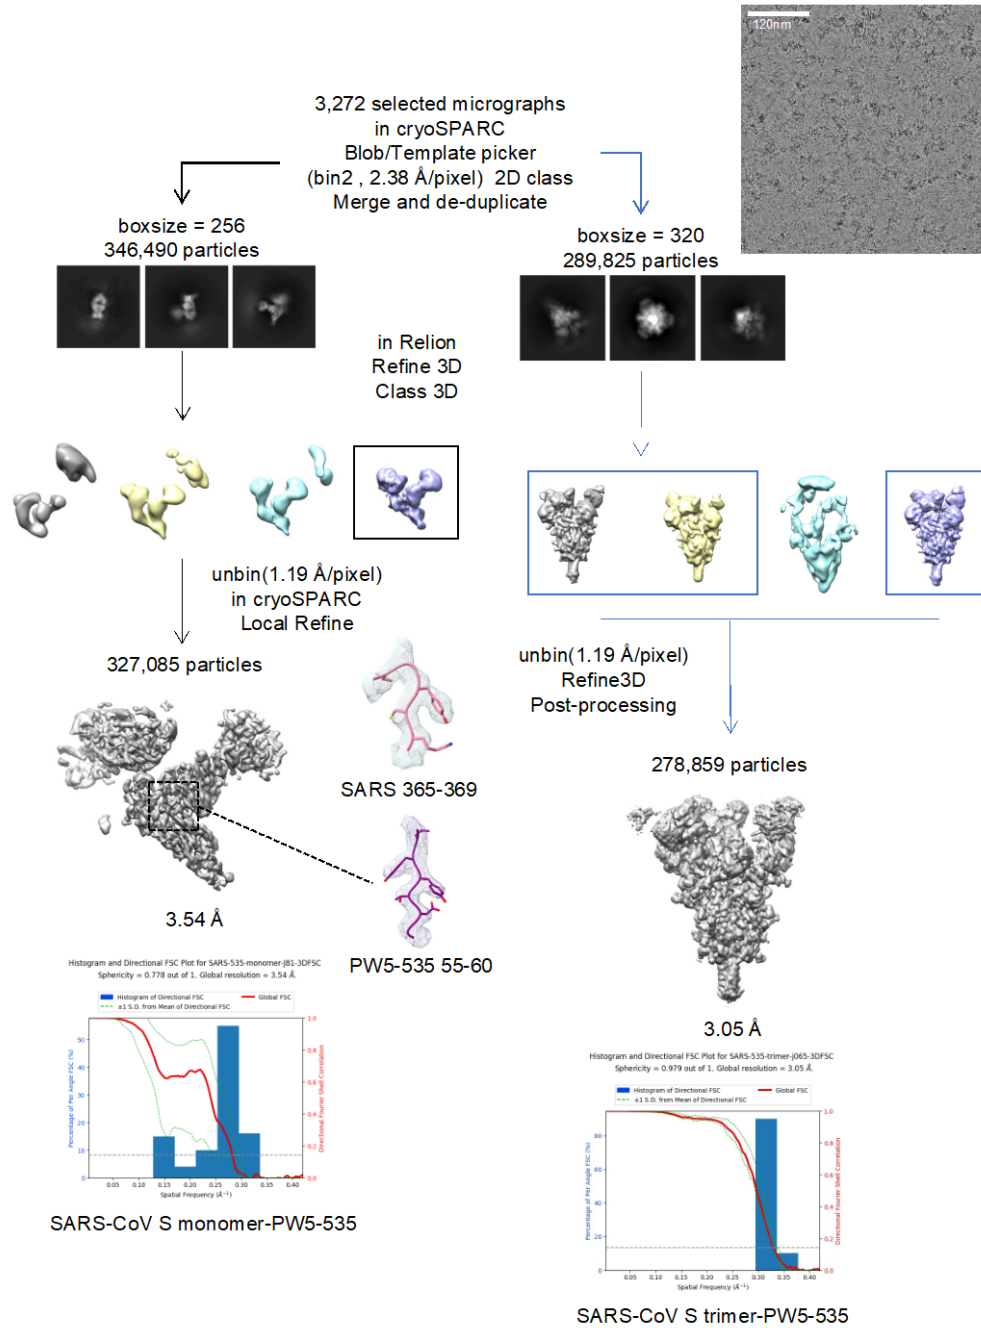

**Supplementary Fig. S19** Data processing flowchart of SARS-CoV-S-PW5-535 complex.

**Supplementary Table S1** Templates of S trimer used in the modeling.

| <b>Trimer type</b>  | <b>PDB ID</b> | <b>Resolution</b> | <b>Target</b> |
|---------------------|---------------|-------------------|---------------|
| 3-RBD-up            | 7CAK          | 3.58Å             | SARS-CoV-2    |
| 2-RBD-up-1-RDB-down | 7WOB          | 3.25 Å            |               |
| 1-RBD-up-2-RDB-down | 7WPA          | 2.77Å             |               |
| 3-RBD-down          | 7OAN          | 3.0Å              |               |
| 3-RBD-up            | 5X59          | 3.7Å              | MERS-CoV      |
| 2-RBD-up-1-RDB-down | 5X5C          | 4.10Å             |               |
| 1-RBD-up-2-RDB-down | 5X5F          | 4.2Å              |               |
| 3-RBD-down          | 6Q04          | 2.8Å              |               |

Supplementary Table S2 Selected antibodies by in-silico screening.

| mAb     | MERS epitope             | Omicron epitope | WT epitope         | High-frequency mAb          | MERS epitope |                    | Omicron epitope           |         | WT epitope         |                | High-frequency mAb |                    |
|---------|--------------------------|-----------------|--------------------|-----------------------------|--------------|--------------------|---------------------------|---------|--------------------|----------------|--------------------|--------------------|
|         | epitope centre           | ranking         | ranking percentage | epitope centre              | ranking      | ranking percentage | epitope centre            | ranking | ranking percentage | epitope centre | ranking            | ranking percentage |
| PWS-6   | MERS_3_RBD_down_1821.pdb | 4               | 0.5% - 1.0%        | omicron_3_RBD_down_1932.pdb | 3            | 0.0% - 0.5%        | OmiWT_3_RBD_down_1932.pdb | 2       | 0.0% - 0.5%        | PWS-1          |                    |                    |
| PWS-8   | MERS_3_RBD_down_1852.pdb | 5               | 0.5% - 1.0%        | omicron_3_RBD_down_1963.pdb | 7            | 1.0% - 1.5%        | OmiWT_3_RBD_down_1963.pdb | 2       | 0.0% - 0.5%        | PWS-2          |                    |                    |
| PWS-18  | MERS_1_RBD_UP_305.pdb    | 1               | 0.0% - 0.5%        | omicron_1_RBD_UP_305.pdb    | 1            | 0.0% - 0.5%        | OmiWT_1_RBD_UP_305.pdb    | 1       | 0.0% - 0.5%        | PWS-4          |                    |                    |
| PWS-19  | MERS_3_RBD_down_1315.pdb | 8               | 1.0% - 1.5%        | omicron_3_RBD_down_1512.pdb | 9            | 1.0% - 1.5%        | OmiWT_3_RBD_down_1512.pdb | 5       | 0.5% - 1.0%        | PWS-5          |                    |                    |
| PWS-23  | MERS_3_RBD_down_1479.pdb | 2               | 0.0% - 0.5%        | omicron_3_RBD_down_1691.pdb | 2            | 0.0% - 0.5%        | OmiWT_3_RBD_down_1691.pdb | 2       | 0.0% - 0.5%        | PWS-7          |                    |                    |
| PWS-29  | MERS_3_RBD_down_1500.pdb | 12              | 1.5% - 2.0%        | omicron_3_RBD_down_1714.pdb | 13           | 1.5% - 2.0%        | OmiWT_3_RBD_down_1714.pdb | 7       | 1.0% - 1.5%        | PWS-10         |                    |                    |
| PWS-207 | MERS_3_RBD_down_598.pdb  | 1               | 0.0% - 0.5%        | omicron_3_RBD_down_635.pdb  | 1            | 0.0% - 0.5%        | OmiWT_3_RBD_down_635.pdb  | 1       | 0.0% - 0.5%        |                |                    |                    |
| PWS-212 | MERS_3_RBD_UP_2253.pdb   | 1               | 0.0% - 0.5%        | omicron_3_RBD_UP_2524.pdb   | 1            | 0.0% - 0.5%        | OmiWT_3_RBD_UP_2524.pdb   | 1       | 0.0% - 0.5%        |                |                    |                    |
| PWS-233 | MERS_3_RBD_down_1315.pdb | 1               | 0.0% - 0.5%        | omicron_3_RBD_down_1512.pdb | 1            | 0.0% - 0.5%        | OmiWT_3_RBD_down_1512.pdb | 1       | 0.0% - 0.5%        |                |                    |                    |
| PWS-238 | MERS_3_RBD_down_2293.pdb | 5               | 0.5% - 1.0%        | omicron_3_RBD_down_2621.pdb | 3            | 0.0% - 0.5%        | OmiWT_3_RBD_down_2621.pdb | 7       | 1.0% - 1.5%        |                |                    |                    |
| PWS-240 | MERS_3_RBD_down_1815.pdb | 10              | 1.0% - 1.5%        | omicron_3_RBD_down_1926.pdb | 7            | 1.0% - 1.5%        | OmiWT_3_RBD_down_1926.pdb | 7       | 1.0% - 1.5%        |                |                    |                    |
| PWS-241 | MERS_2_RBD_UP_887.pdb    | 5               | 0.5% - 1.0%        | omicron_2_RBD_UP_929.pdb    | 3            | 0.0% - 0.5%        | OmiWT_2_RBD_UP_929.pdb    | 2       | 0.0% - 0.5%        |                |                    |                    |
| PWS-253 | MERS_3_RBD_down_598.pdb  | 5               | 0.5% - 1.0%        | omicron_3_RBD_down_635.pdb  | 11           | 1.5% - 2.0%        | OmiWT_3_RBD_down_635.pdb  | 11      | 1.5% - 2.0%        |                |                    |                    |
| PWS-259 | MERS_3_RBD_down_1745.pdb | 12              | 1.5% - 2.0%        | omicron_3_RBD_down_1856.pdb | 8            | 1.0% - 1.5%        | OmiWT_3_RBD_down_1856.pdb | 8       | 1.0% - 1.5%        |                |                    |                    |
| PWS-265 | MERS_3_RBD_down_1884.pdb | 9               | 1.0% - 1.5%        | omicron_3_RBD_down_1995.pdb | 13           | 1.5% - 2.0%        | OmiWT_3_RBD_down_1995.pdb | 13      | 1.5% - 2.0%        |                |                    |                    |
| PWS-270 | MERS_3_RBD_UP_2757.pdb   | 11              | 1.5% - 2.0%        | omicron_3_RBD_UP_2858.pdb   | 4            | 0.5% - 1.0%        | OmiWT_3_RBD_UP_2858.pdb   | 5       | 0.5% - 1.0%        |                |                    |                    |
| PWS-274 | MERS_3_RBD_down_1791.pdb | 12              | 1.5% - 2.0%        | omicron_3_RBD_down_1902.pdb | 3            | 0.0% - 0.5%        | OmiWT_3_RBD_down_1902.pdb | 3       | 0.0% - 0.5%        |                |                    |                    |
| PWS-283 | MERS_3_RBD_down_1852.pdb | 6               | 0.5% - 1.0%        | omicron_3_RBD_down_1963.pdb | 4            | 0.5% - 1.0%        | OmiWT_3_RBD_down_1963.pdb | 1       | 0.0% - 0.5%        |                |                    |                    |
| PWS-288 | MERS_3_RBD_down_1479.pdb | 10              | 1.0% - 1.5%        | omicron_3_RBD_down_1691.pdb | 4            | 0.5% - 1.0%        | OmiWT_3_RBD_down_1691.pdb | 7       | 1.0% - 1.5%        |                |                    |                    |
| PWS-298 | MERS_3_RBD_down_1458.pdb | 9               | 1.0% - 1.5%        | omicron_3_RBD_down_1669.pdb | 13           | 1.5% - 2.0%        | OmiWT_3_RBD_down_1669.pdb | 12      | 1.5% - 2.0%        |                |                    |                    |
| PWS-313 | MERS_3_RBD_down_1479.pdb | 11              | 1.5% - 2.0%        | omicron_3_RBD_down_1691.pdb | 7            | 1.0% - 1.5%        | OmiWT_3_RBD_down_1691.pdb | 4       | 0.5% - 1.0%        |                |                    |                    |
| PWS-331 | MERS_3_RBD_UP_2763.pdb   | 10              | 1.0% - 1.5%        | omicron_3_RBD_UP_2864.pdb   | 11           | 1.5% - 2.0%        | OmiWT_3_RBD_UP_2864.pdb   | 5       | 0.5% - 1.0%        |                |                    |                    |
| PWS-335 | MERS_3_RBD_down_1489.pdb | 3               | 0.0% - 0.5%        | omicron_3_RBD_down_1587.pdb | 4            | 0.5% - 1.0%        | OmiWT_3_RBD_down_1587.pdb | 9       | 1.0% - 1.5%        |                |                    |                    |
| PWS-363 | MERS_3_RBD_UP_2757.pdb   | 3               | 0.0% - 0.5%        | omicron_3_RBD_UP_2858.pdb   | 5            | 0.5% - 1.0%        | OmiWT_3_RBD_UP_2858.pdb   | 4       | 0.5% - 1.0%        |                |                    |                    |
| PWS-380 | MERS_3_RBD_UP_2708.pdb   | 11              | 1.5% - 2.0%        | omicron_3_RBD_UP_2809.pdb   | 7            | 1.0% - 1.5%        | OmiWT_3_RBD_UP_2809.pdb   | 10      | 1.0% - 1.5%        |                |                    |                    |
| PWS-394 | MERS_3_RBD_down_1881.pdb | 4               | 0.5% - 1.0%        | omicron_3_RBD_down_1992.pdb | 5            | 0.5% - 1.0%        | OmiWT_3_RBD_down_1992.pdb | 5       | 0.5% - 1.0%        |                |                    |                    |
| PWS-399 | MERS_2_RBD_UP_744.pdb    | 5               | 0.5% - 1.0%        | omicron_2_RBD_UP_818.pdb    | 1            | 0.0% - 0.5%        | OmiWT_2_RBD_UP_818.pdb    | 3       | 0.0% - 0.5%        |                |                    |                    |
| PWS-412 | MERS_3_RBD_down_1851.pdb | 1               | 0.0% - 0.5%        | omicron_3_RBD_down_1962.pdb | 1            | 0.0% - 0.5%        | OmiWT_3_RBD_down_1962.pdb | 1       | 0.0% - 0.5%        |                |                    |                    |
| PWS-419 | MERS_3_RBD_down_1812.pdb | 6               | 0.5% - 1.0%        | omicron_3_RBD_down_1923.pdb | 3            | 0.0% - 0.5%        | OmiWT_3_RBD_down_1923.pdb | 2       | 0.0% - 0.5%        |                |                    |                    |
| PWS-420 | MERS_3_RBD_down_1812.pdb | 12              | 1.5% - 2.0%        | omicron_3_RBD_down_1923.pdb | 5            | 0.5% - 1.0%        | OmiWT_3_RBD_down_1923.pdb | 10      | 1.0% - 1.5%        |                |                    |                    |
| PWS-421 | MERS_3_RBD_down_1500.pdb | 8               | 1.0% - 1.5%        | omicron_3_RBD_down_1600.pdb | 11           | 1.5% - 2.0%        | OmiWT_3_RBD_down_1600.pdb | 6       | 0.5% - 1.0%        |                |                    |                    |
| PWS-428 | MERS_3_RBD_down_1817.pdb | 6               | 0.5% - 1.0%        | omicron_3_RBD_down_1928.pdb | 10           | 1.0% - 1.5%        | OmiWT_3_RBD_down_1928.pdb | 10      | 1.0% - 1.5%        |                |                    |                    |
| PWS-432 | MERS_3_RBD_UP_1811.pdb   | 5               | 0.5% - 1.0%        | omicron_3_RBD_UP_1888.pdb   | 13           | 1.5% - 2.0%        | OmiWT_3_RBD_UP_1888.pdb   | 13      | 1.5% - 2.0%        |                |                    |                    |
| PWS-433 | MERS_3_RBD_down_1506.pdb | 12              | 1.5% - 2.0%        | omicron_3_RBD_down_1721.pdb | 2            | 0.0% - 0.5%        | OmiWT_3_RBD_down_1721.pdb | 12      | 1.5% - 2.0%        |                |                    |                    |
| PWS-436 | MERS_3_RBD_down_1823.pdb | 9               | 1.0% - 1.5%        | omicron_3_RBD_down_1934.pdb | 1            | 0.0% - 0.5%        | OmiWT_3_RBD_down_1934.pdb | 2       | 0.0% - 0.5%        |                |                    |                    |
| PWS-459 | MERS_3_RBD_UP_619.pdb    | 5               | 0.5% - 1.0%        | omicron_3_RBD_UP_700.pdb    | 13           | 1.5% - 2.0%        | OmiWT_3_RBD_UP_700.pdb    | 13      | 1.5% - 2.0%        |                |                    |                    |
| PWS-460 | MERS_3_RBD_down_1872.pdb | 13              | 1.5% - 2.0%        | omicron_3_RBD_down_1983.pdb | 13           | 1.5% - 2.0%        | OmiWT_3_RBD_down_1983.pdb | 13      | 1.5% - 2.0%        |                |                    |                    |
| PWS-468 | MERS_3_RBD_down_1827.pdb | 2               | 0.0% - 0.5%        | omicron_3_RBD_down_1938.pdb | 1            | 0.0% - 0.5%        | OmiWT_3_RBD_down_1938.pdb | 2       | 0.0% - 0.5%        |                |                    |                    |
| PWS-477 | MERS_1_RBD_UP_60.pdb     | 10              | 1.0% - 1.5%        | omicron_1_RBD_UP_60.pdb     | 7            | 1.0% - 1.5%        | OmiWT_1_RBD_UP_60.pdb     | 7       | 1.0% - 1.5%        |                |                    |                    |
| PWS-479 | MERS_1_RBD_UP_60.pdb     | 5               | 0.5% - 1.0%        | omicron_1_RBD_UP_60.pdb     | 2            | 0.0% - 0.5%        | OmiWT_1_RBD_UP_60.pdb     | 2       | 0.0% - 0.5%        |                |                    |                    |
| PWS-492 | MERS_3_RBD_UP_1820.pdb   | 6               | 0.5% - 1.0%        | omicron_3_RBD_UP_1897.pdb   | 7            | 1.0% - 1.5%        | OmiWT_3_RBD_UP_1897.pdb   | 7       | 1.0% - 1.5%        |                |                    |                    |
| PWS-494 | MERS_3_RBD_down_1851.pdb | 2               | 0.0% - 0.5%        | omicron_3_RBD_down_1962.pdb | 2            | 0.0% - 0.5%        | OmiWT_3_RBD_down_1962.pdb | 2       | 0.0% - 0.5%        |                |                    |                    |
| PWS-508 | MERS_3_RBD_down_1670.pdb | 11              | 1.5% - 2.0%        | omicron_3_RBD_down_1781.pdb | 7            | 1.0% - 1.5%        | OmiWT_3_RBD_down_1781.pdb | 5       | 0.5% - 1.0%        |                |                    |                    |
| PWS-510 | MERS_1_RBD_UP_1495.pdb   | 4               | 0.5% - 1.0%        | omicron_1_RBD_UP_1739.pdb   | 4            | 0.5% - 1.0%        | OmiWT_1_RBD_UP_1739.pdb   | 4       | 0.5% - 1.0%        |                |                    |                    |
| PWS-522 | MERS_3_RBD_UP_2708.pdb   | 13              | 1.5% - 2.0%        | omicron_3_RBD_UP_2809.pdb   | 3            | 0.0% - 0.5%        | OmiWT_3_RBD_UP_2809.pdb   | 3       | 0.0% - 0.5%        |                |                    |                    |
| PWS-524 | MERS_3_RBD_UP_2708.pdb   | 4               | 0.5% - 1.0%        | omicron_3_RBD_UP_2809.pdb   | 8            | 1.0% - 1.5%        | OmiWT_3_RBD_UP_2809.pdb   | 4       | 0.5% - 1.0%        |                |                    |                    |
| PWS-530 | MERS_3_RBD_down_1376.pdb | 5               | 0.5% - 1.0%        | omicron_3_RBD_down_1580.pdb | 2            | 0.0% - 0.5%        | OmiWT_3_RBD_down_1580.pdb | 1       | 0.0% - 0.5%        |                |                    |                    |
| PWS-534 | MERS_3_RBD_down_1799.pdb | 13              | 1.5% - 2.0%        | omicron_3_RBD_down_1910.pdb | 12           | 1.5% - 2.0%        | OmiWT_3_RBD_down_1910.pdb | 12      | 1.5% - 2.0%        |                |                    |                    |
| PWS-535 | MERS_1_RBD_UP_847.pdb    | 3               | 0.0% - 0.5%        | omicron_1_RBD_UP_898.pdb    | 3            | 0.0% - 0.5%        | OmiWT_1_RBD_UP_898.pdb    | 3       | 0.0% - 0.5%        |                |                    |                    |
| PWS-540 | MERS_3_RBD_down_1568.pdb | 3               | 0.0% - 0.5%        | omicron_3_RBD_down_1673.pdb | 6            | 0.5% - 1.0%        | OmiWT_3_RBD_down_1673.pdb | 6       | 0.5% - 1.0%        |                |                    |                    |
| PWS-544 | MERS_1_RBD_UP_1640.pdb   | 1               | 0.0% - 0.5%        | omicron_1_RBD_UP_1775.pdb   | 1            | 0.0% - 0.5%        | OmiWT_1_RBD_UP_1775.pdb   | 2       | 0.0% - 0.5%        |                |                    |                    |
| PWS-546 | MERS_3_RBD_down_1479.pdb | 1               | 0.0% - 0.5%        | omicron_3_RBD_down_1691.pdb | 1            | 0.0% - 0.5%        | OmiWT_3_RBD_down_1691.pdb | 1       | 0.0% - 0.5%        |                |                    |                    |
| PWS-547 | MERS_3_RBD_down_1315.pdb | 6               | 0.5% - 1.0%        | omicron_3_RBD_down_1512.pdb | 6            | 0.5% - 1.0%        | OmiWT_3_RBD_down_1512.pdb | 10      | 1.0% - 1.5%        |                |                    |                    |
| PWS-558 | MERS_3_RBD_down_1535.pdb | 8               | 1.0% - 1.5%        | omicron_3_RBD_down_1751.pdb | 4            | 0.5% - 1.0%        | OmiWT_3_RBD_down_1751.pdb | 4       | 0.5% - 1.0%        |                |                    |                    |
| PWS-570 | MERS_3_RBD_down_1284.pdb | 3               | 0.0% - 0.5%        | omicron_3_RBD_down_1479.pdb | 6            | 0.5% - 1.0%        | OmiWT_3_RBD_down_1479.pdb | 6       | 0.5% - 1.0%        |                |                    |                    |
| PWS-576 | MERS_1_RBD_UP_1574.pdb   | 3               | 0.0% - 0.5%        | omicron_1_RBD_UP_1822.pdb   | 1            | 0.0% - 0.5%        | OmiWT_1_RBD_UP_1822.pdb   | 1       | 0.0% - 0.5%        |                |                    |                    |
| PWS-609 | MERS_1_RBD_UP_60.pdb     | 7               | 1.0% - 1.5%        | omicron_1_RBD_UP_60.pdb     | 3            | 0.0% - 0.5%        | OmiWT_1_RBD_UP_60.pdb     | 3       | 0.0% - 0.5%        |                |                    |                    |
| PWS-633 | MERS_3_RBD_UP_1820.pdb   | 1               | 0.0% - 0.5%        | omicron_3_RBD_UP_1897.pdb   | 1            | 0.0% - 0.5%        | OmiWT_3_RBD_UP_1897.pdb   | 1       | 0.0% - 0.5%        |                |                    |                    |
| PWS-646 | MERS_3_RBD_UP_1820.pdb   | 8               | 1.0% - 1.5%        | omicron_3_RBD_UP_1897.pdb   | 9            | 1.0% - 1.5%        | OmiWT_3_RBD_UP_1897.pdb   | 9       | 1.0% - 1.5%        |                |                    |                    |
| PWS-656 | MERS_3_RBD_down_1794.pdb | 7               | 1.0% - 1.5%        | omicron_3_RBD_down_1905.pdb | 8            | 1.0% - 1.5%        | OmiWT_3_RBD_down_1905.pdb | 6       | 0.5% - 1.0%        |                |                    |                    |
| PWS-676 | MERS_3_RBD_down_1851.pdb | 5               | 0.5% - 1.0%        | omicron_3_RBD_down_1962.pdb | 8            | 1.0% - 1.5%        | OmiWT_3_RBD_down_1962.pdb | 7       | 1.0% - 1.5%        |                |                    |                    |
| PWS-683 | MERS_3_RBD_down_1793.pdb | 4               | 0.5% - 1.0%        | omicron_3_RBD_down_1904.pdb | 1            | 0.0% - 0.5%        | OmiWT_3_RBD_down_1904.pdb | 7       | 1.0% - 1.5%        |                |                    |                    |
| PWS-693 | MERS_1_RBD_UP_1495.pdb   | 9               | 1.0% - 1.5%        | omicron_1_RBD_UP_1739.pdb   | 3            | 0.0% - 0.5%        | OmiWT_1_RBD_UP_1739.pdb   | 3       | 0.0% - 0.5%        |                |                    |                    |
| PWS-694 | MERS_3_RBD_down_1284.pdb | 1               | 0.0% - 0.5%        | omicron_3_RBD_down_1479.pdb | 4            | 0.5% - 1.0%        | OmiWT_3_RBD_down_1479.pdb | 4       | 0.5% - 1.0%        |                |                    |                    |
| PWS-699 | MERS_3_RBD_down_1884.pdb | 8               | 1.0% - 1.5%        | omicron_3_RBD_down_1995.pdb | 12           | 1.5% - 2.0%        | OmiWT_3_RBD_down_1995.pdb | 12      | 1.5% - 2.0%        |                |                    |                    |
| PWS-710 | MERS_3_RBD_UP_2253.pdb   | 8               | 1.0% - 1.5%        | omicron_3_RBD_UP_2524.pdb   | 2            | 0.0% - 0.5%        | OmiWT_3_RBD_UP_2524.pdb   | 2       | 0.0% - 0.5%        |                |                    |                    |
| PWS-720 | MERS_3_RBD_down_1500.pdb | 2               | 0.0% - 0.5%        | omicron_3_RBD_down_1600.pdb | 4            | 0.5% - 1.0%        | OmiWT_3_RBD_down_1600.pdb | 9       | 1.0% - 1.5%        |                |                    |                    |
| PWS-722 | MERS_3_RBD_UP_619.pdb    | 10              | 1.0% - 1.5%        | omicron_3_RBD_UP_700.pdb    | 13           | 1.5% - 2.0%        | OmiWT_3_RBD_UP_700.pdb    | 13      | 1.5% - 2.0%        |                |                    |                    |
| PWS-786 | MERS_1_RBD_UP_1640.pdb   | 13              | 1.5% - 2.0%        | omicron_1_RBD_UP_1775.pdb   | 5            | 0.5% - 1.0%        | OmiWT_1_RBD_UP_1775.pdb   | 10      | 1.0% - 1.5%        |                |                    |                    |
| PWS-803 | MERS_1_RBD_UP_60.pdb     | 4               | 0.5% - 1.0%        | omicron_1_RBD_UP_60.pdb     | 4            | 0.5% - 1.0%        | OmiWT_1_RBD_UP_60.pdb     | 4       | 0.5% - 1.0%        |                |                    |                    |
| PWS-807 | MERS_1_RBD_UP_1640.pdb   | 10              | 1.0% - 1.5%        | omicron_1_RBD_UP_1775.pdb   | 10           | 1.0% - 1.5%        | OmiWT_1_RBD_UP_1775.pdb   | 9       | 1.0% - 1.5%        |                |                    |                    |
| PWS-808 | MERS_3_RBD_down_1881.pdb | 8               | 1.0% - 1.5%        | omicron_3_RBD_down_1992.pdb | 7            | 1.0% - 1.5%        | OmiWT_3_RBD_down_1992.pdb | 7       | 1.0% - 1.5%        |                |                    |                    |
| PWS-819 | MERS_3_RBD_down_1740.pdb | 1               | 0.0% - 0.5%        | omicron_3_RBD_down_1851.pdb | 3            | 0.0% - 0.5%        | OmiWT_3_RBD_down_1851.pdb | 3       | 0.0% - 0.5%        |                |                    |                    |
| PWS-850 | MERS_1_RBD_UP_60.pdb     | 1               | 0.0% - 0.5%        | omicron_1_RBD_UP_60.pdb     | 1            | 0.0% - 0.5%        | OmiWT_1_RBD_UP_60.pdb     | 1       | 0.0% - 0.5%        |                |                    |                    |
| PWS-853 | MERS_3_RBD_UP_1811.pdb   | 6               | 0.5% - 1.0%        | omicron_3_RBD_UP_1888.pdb   | 6            | 0.5% - 1.0%        | OmiWT_3_RBD_UP_1888.pdb   | 6       | 0.5% - 1.0%        |                |                    |                    |
| PWS-862 | MERS_1_RBD_UP_305.pdb    | 4               | 0.5% - 1.0%        | omicron_1_RBD_UP_305.pdb    | 9            | 1.0% - 1.5%        | OmiWT_1_RBD_UP_305.pdb    | 9       | 1.0% - 1.5%        |                |                    |                    |
| PWS-879 | MERS_1_RBD_UP_60.pdb     | 8               | 1.0% - 1.5%        | omicron_1_RBD_UP_60.pdb     | 11           | 1.5% - 2.0%        | OmiWT_1_RBD_UP_60.pdb     | 11      | 1.5% - 2.0%        |                |                    |                    |
| PWS-884 | MERS_1_RBD_UP_60.pdb     | 6               | 0.5% - 1.0%        | omicron_1_RBD_UP_60.pdb     | 8            | 1.0% - 1.5%        | OmiWT_1_RBD_UP_60.pdb     | 8       | 1.0% - 1.5%        |                |                    |                    |
| PWS-885 | MERS_1_RBD_UP_60.pdb     | 3               | 0.0% - 0.5%        | omicron_1_RBD_UP_60.pdb     | 13           | 1.5% - 2.0%        | OmiWT_1_RBD_UP_60.pdb     | 13      | 1.5% - 2.0%        |                |                    |                    |
| PWS-897 | MERS_1_RBD_UP_305.pdb    | 11              | 1.5% - 2.0%        | omicron_1_RBD_UP_305.pdb    | 4            | 0.5% - 1.0%        | OmiWT_1_RBD_UP_305.pdb    | 4       | 0.5% - 1.0%        |                |                    |                    |



**Supplementary Table S3** Cryo-EM data collection and refinement statistics.

|                                       | PW5-5                 |                        |              |           |           | PW5-535   |           |              |           | PW5-570   |           |
|---------------------------------------|-----------------------|------------------------|--------------|-----------|-----------|-----------|-----------|--------------|-----------|-----------|-----------|
|                                       | XBB                   |                        | SARS-CoV     |           |           | XBB       |           | SARS-CoV     |           | BA.1      |           |
|                                       | trimer-1<br>3up,3Fabs | trimer-2,<br>2up,2Fabs | monomer      | trimer    | local     | trimer    | local     | trimer       | monomer   | trimer    | local     |
| <b>Data collection and processing</b> |                       |                        |              |           |           |           |           |              |           |           |           |
| Magnification                         |                       |                        | 130,000      |           |           |           |           | 105,000      |           |           |           |
| Voltage (kV)                          |                       |                        | 300          |           |           |           |           | 300          |           |           |           |
| Total dose (e-/Å <sup>2</sup> )       |                       |                        | 50           |           |           |           |           | 50           |           |           |           |
| Defocus range (µm)                    |                       |                        | -1.0 to -3.0 |           |           |           |           | -1.0 to -3.0 |           |           |           |
| Pixel size (Å)                        |                       |                        | 0.932        |           |           |           |           | 1.19         |           |           |           |
| Symmetry imposed                      |                       |                        | C1           |           |           |           |           | C1           |           |           |           |
| Final particles (no.)                 | 208,476               | 130,701                | 166,548      | 649,448   | 649,448   | 669,397   | 298,238   | 278,859      | 327,085   | 439,708   | 439,708   |
| Map resolution (Å)                    | 3.14                  | 3.21                   | 3.73         | 2.87      | 3.04      | 2.95      | 3.40      | 3.05         | 3.54      | 2.78      | 2.93      |
| <b>Refinement</b>                     |                       |                        |              |           |           |           |           |              |           |           |           |
| <b>R.m.s. deviations</b>              |                       |                        |              |           |           |           |           |              |           |           |           |
| Bond lengths (Å)                      | 0.002                 | 0.002                  | 0.003        | 0.002     | 0.002     | 0.002     | 0.002     | 0.002        | 0.002     | 0.002     | 0.002     |
| Bond angles (°)                       | 0.516                 | 0.484                  | 0.653        | 0.448     | 0.515     | 0.469     | 0.619     | 0.470        | 0.478     | 0.437     | 0.638     |
| <b>Validation</b>                     |                       |                        |              |           |           |           |           |              |           |           |           |
| MolProbity score                      | 2.22                  | 2.17                   | 2.46         | 2.33      | 2.44      | 2.24      | 2.57      | 2.36         | 2.65      | 1.97      | 2.09      |
| Clashscore                            | 6.38                  | 6.27                   | 7.21         | 7.95      | 7.77      | 6.77      | 8.73      | 6.91         | 9.40      | 5.38      | 4.63      |
| Rotamer outlier (%)                   | 4.46                  | 4.27                   | 5.75         | 4.45      | 5.91      | 4.76      | 6.20      | 5.05         | 5.79      | 3.03      | 2.78      |
| <b>Ramachandran</b>                   |                       |                        |              |           |           |           |           |              |           |           |           |
| plot                                  | 94.48                 | 94.93                  | 92.11        | 94.01     | 93.38     | 94.90     | 91.57     | 92.97        | 89.18     | 95.43     | 91.07     |
| Favored (%)                           | 5.52                  | 5.04                   | 7.70         | 5.99      | 6.62      | 5.08      | 8.43      | 6.96         | 10.71     | 4.57      | 8.93      |
| Allowed (%)                           | 0.00                  | 0.02                   | 0.19         | 0.00      | 0.00      | 0.02      | 0.00      | 0.07         | 0.10      | 0.00      | 0.00      |
| Disallowed (%)                        |                       |                        |              |           |           |           |           |              |           |           |           |
| <b>EMDB</b>                           | EMD-37164             | EMD-37157              | EMD-37160    | EMD-37139 | EMD-37145 | EMD-37165 | EMD-37143 | EMD-37144    | EMD-37161 | EMD-37162 | EMD-37163 |
| <b>PDB</b>                            | 8KEQ                  | 8KEH                   | 8KEJ         | 8KDM      | 8KDT      | 8KER      | 8KDR      | 8KDS         | 8KEK      | 8KEO      | 8KEP      |
